# External evaluation of population pharmacokinetic models for vancomycin in neonates

Tõnis Tasa<sup>a\*</sup>, Riste Kalamees<sup>c</sup>, Jaak Vilo<sup>a</sup>, Irja Lutsar<sup>b</sup>, Tuuli Metsvaht<sup>c</sup>

<sup>a</sup> Institute of Computer Science, University of Tartu, J. Liivi 2, 50409, Tartu, Estonia

<sup>b</sup> Department of Microbiology, University of Tartu, Ravila 19, 50411, Tartu, Estonia

<sup>c</sup> Clinic of Anaesthesiology and Intensive Care, Tartu University Hospital, L. Puusepa 8, 51014, Tartu, Estonia

**Principal investigator:** Tuuli Metsvaht

**\* Corresponding author:** Tõnis Tasa

**Address:** Institute of Computer Science, University of Tartu, J. Liivi 2, 50409, Tartu, Estonia

**e-mail:** [ttasa@ut.ee](mailto:ttasa@ut.ee)

**Orcid ID.** Tõnis Tasa: 0000-0001-7754-6413, Jaak Vilo: 0000-0001-5604-410, Irja Lutsar: 0000-0002-5082-429X, Tuuli Metsvaht: 0000-0003-3206-3092

## **Abstract**

### **Introduction**

Numerous vancomycin population pharmacokinetic (PK) models of neonates have been published. We aimed to comparatively evaluate a set of these models by quantifying their model-based and Bayesian concentration prediction performances using an external retrospective dataset, and estimate their attainment rates in predefined therapeutic target ranges.

### **Methods**

Implementations of 12 published PK models were added in the Bayesian dose optimisation tool, DosOpt. Model based concentration predictions informed by variable number of individual concentrations were evaluated using multiple error metrics. A simulation study assessed the probabilities of target attainment (PTA) in trough concentration target ranges 10–15 mg/L and 10–20 mg/L.

### **Results**

Normalized prediction distribution error analysis revealed external validation dataset discordances (global  $P < 0.05$ ) with all population PK models. Inclusion of a single concentration improved both precision and accuracy. The model by Marques-Minana *et al.* (2010) attained 68% of predictions within 30% of true concentrations. Absolute percentage errors of most models were within 20-30%. Mean PTA with Zhao *et al.* (2013) was 40.4% [coefficient-of-variation (CV) 0.5%] and 62.9% (CV 0.4%) within 10–15 mg/L and 10–20 mg/L, respectively.

### **Conclusion**

Predictive performances varied widely between models. Population based predictions were discordant with external validation dataset but Bayesian modelling with individual

concentrations improved both precision and accuracy. Current vancomycin PK models achieve relatively low attainment of commonly recommended therapeutic target ranges.

## Introduction

For several decades, vancomycin has been one of the most widely used antibiotics in neonatal intensive care unit [1]. Therapeutic drug monitoring (TDM) is recommended due to narrow therapeutic window, especially in special patient populations like neonates, severely or critically ill etc. [2,3]. However, despite some agreement on optimal vancomycin pharmacodynamic (PD) indices and target values [4], there is little consensus on TDM based dose adjustment strategies that effectively account for high inter-individual variability [5].

The area under the curve (AUC)/ minimum inhibitory concentration (MIC) of  $>400$  has been suggested as the best predictor of vancomycin efficacy in adults with MRSA infection [2]. However, specific software for AUC calculation as well as MIC values may not be readily available in many hospitals. Also, resulting AUC estimates are often inconsistent due to differences in choices of time-concentration curve fitting model, sampling times and estimation method [6,7]. Therapeutic considerations and relative ease of trough concentration ( $C_{\text{trough}}$ ) measurements make it a common proxy for therapeutic vancomycin targeting [8–10].  $C_{\text{trough}}$  of 10 mg/L has been demonstrated as predictive and sufficient to achieve  $\text{AUC}>400$  with high probability in paediatric populations with intermittent infusion [11–15].

A large number of population models have attempted elucidating vancomycin pharmacokinetic (PK) properties in neonates, and have applied a wide range of different structural models, covariates and methodological approaches in development [11,16–26]. These models mostly apply internal checks while only a small subset has been externally validated [27–29]. Such neglect causes prediction biases in external populations, as demonstrated by Zhao *et al.* [30]. Therefore, external assessments of model generalizability are essential for successful model portability and use in TDM applications.

Development of computational methods has introduced novel precision dosing methods to the TDM toolset [31,32]. Simple population-based empiric dose calculators can attain higher concentration prediction accuracy with Bayesian approaches that combine individual concentration measurements with population models [32,33]. Consequently, several recent software apply Bayesian methods for TDM dose optimisation including BestDose, TDMx, and DosOpt [34–36]. For example, our developed DosOpt (<https://www.biit.cs.ut.ee/DosOpt>) uses timed patient concentrations combined with population PK data to generate individual estimates, time-concentration curve simulations, and estimations of attainment probability for selected PK/PD target ranges.

Bayesian TDM tools require estimates of population PK that are often derived from published models. Thus, comparative model evaluations can help guide the selection of PK models for TDM tools by elucidating model prediction performance dynamics. Such evaluations that include Bayesian diagnostics, by accounting for kinetics re-adjustments with individual concentrations, have so far been performed for tacrolimus and cyclosporine but are still missing for most other drugs, including vancomycin [37,38].

We aimed to externally evaluate published neonatal vancomycin PK models to identify suitable prior population PK estimates for Bayesian vancomycin TDM. For that, we first assessed between- and within model predictive performances, while also considering re-adjustment to new patient observations. Next, we estimated vancomycin trough concentration attainment rates in therapeutic ranges to assess practical model utility.

## **Methods**

### *Vancomycin PK models*

Vancomycin PK models were included based on following criteria: (a) use of population-based, non-linear mixed effects PK modelling, (b) detailed characterisation of model

structure, its compartments, and provided estimates of fixed, residual, and random effects, and (c) the average postnatal age (PNA) of the population less than 4 months.

To identify eligible models, we conducted a PubMed search by using the terms, “vancomycin AND (infant OR paediatric OR neonate) AND pharmacokinetic AND (model OR review)” until October 2017. This primary search was additionally filtered for studies published in English and involving human species. Identified articles were filtered for evidence of fitted PK models in neonatal populations. Models were further checked for availability of reported estimates, model duplications and PNA. Review articles of PK models were also identified.

#### *External validation dataset*

The external validation dataset consisted of all patients who were admitted to the paediatric intensive care unit of Tartu University Hospital, received vancomycin, had PNA < 90 days and had at least one vancomycin concentration measurement collected for TDM between 1 January 2010 and 31 December 2015, as described previously [34]. TDM samples collected up to 2-hours before the next dose were denoted as  $C_{\text{trough}}$  and those collected 50-70 minutes after commencement of infusion were classified as peak measurements ( $C_{\text{peak}}$ ). Patient cases were handled as multiple individual episodes if at least a one-week gap occurred between two courses of vancomycin treatment. The following parameters were collected from hospital records: gestational age (GA), PNA, postmenstrual age (PMA), birth weight (BW), current weight (CW), serum creatinine measurement according to the Jaffe kinetic method standardized by isotope dilution mass spectrometry, use of ibuprofen or indomethacin, inotropes, and gentamicin, and respiratory support. Vancomycin was dosed according to Neofax [39] and given via a 1-hour infusion. Required dose adjustments were made at the discretion of the treating physician. Vancomycin concentrations were measured using a fluorescence polarization immunoassay (FPIA) according to the manufacturer’s instructions

(Cobas Integra 400/800 Analyzer, Roche, Mannheim, Germany). The average vancomycin assay coefficient of variation was 3.5% and the lower limit of quantification was 0.74 mg/L. The Ethics Committee of the University of Tartu approved the study in Protocol No. 256/T-23. This study was a retrospective analysis with anonymized data so informed consent was not required.

### *Evaluation framework*

All of the external evaluation operations were performed by using Bayesian TDM software DosOpt [34]. Eligible vancomycin PK models were implemented into DosOpt and made available at <https://biit.cs.ut.ee/DosOpt>. Other computations were performed with R (version 3.3.3) [40].

### *Population model diagnostics*

We first evaluated the predictive diagnostics of population models using normalized prediction distribution error (NPDE) approach implemented in R package npde (version 2.0). A model was concordant with data when prediction errors followed a standardized Gaussian distribution. Simulation based visual predictive checks were not informative due to highly variable individually adjusted dosing schedules, sampling times and intervals [41].

We then tested if inclusion of individual concentrations improves population model fits. For accuracy, we estimated the model-wise individual mean prediction errors (MPE) as  $\frac{100}{n} * \sum_i^n (y_i - f_i)/y_i$ . Here,  $n$  is number of concentrations measured for an individual,  $y$  is the

observed and  $f$  the predicted concentration value. For precision, we used mean absolute prediction errors (MAPE),  $\frac{100}{n} * \sum_i^n \left| (y_i - f_i)/y_i \right|$ . Concentration predictions were derived

from the median of time-concentration curves simulated from 1000 posterior sets of PK

parameters estimated with DosOpt, and were derived firstly for base population model predictions and secondly for Bayesian estimates of base models combined with full set of individual concentration measurements collected over the course of individual treatments. We also computed a priori and a posteriori adjusted-R<sup>2</sup> between observed and predicted data to estimate the proportion and the magnitude of explained variability induced by inclusion of individual concentrations.

### *Bayesian diagnostics*

Next, we quantified predictive performances in groups of 0, 1 or 2 individual concentrations included in PK estimation. We used the median of simulated time-concentration curves to predict the next available timed concentration not included in modelling. As such, prediction accuracy was separately evaluated for individual cases with at least 1, 2 or >2 available concentrations. Accuracy for the  $i_{th}$  individual was evaluated in terms of prediction errors (PE),  $(y_i - f_i)/y_i$ , absolute errors (AE) as,  $|y_i - f_i|$ , and absolute percentage errors (APE)

as  $\left| (y_i - f_i)/y_i \right|$ . Endpoints F20 and F30 denote the percentage of individual PEs within  $\pm 20\%$  and  $\pm 30\%$ , respectively.

### *Probability of target attainment simulations*

Finally, DosOpt was used to estimate the probabilities of achieving therapeutically desired target  $C_{trough}$  ranges in a Bayesian setup given a prior PK model, individual dosing history and variable number of concentrations guiding kinetics estimation.

DosOpt optimization searched for a dose that generated time-concentration curves which attain the target  $C_{trough}$  window with highest probability. We devised an optimization scenario to find a dose for 1-hour infusion that would achieve the maximal PTA at the trough



concentration, 8-hours after the start of infusion, in target  $C_{\text{trough}}$  ranges of 10–15 mg/L and 10–20 mg/L. The dose administration was simulated to start from steady-state concentration of 10 mg/L

Variance of simulated PK profiles is dependent on the variability of model between-subject parameters and residual model parameters, and the extent of shrinkage in kinetics estimation with individual data. As such, narrow targets would theoretically be better attained with models of low variability even if systematically biased. To remove that source of bias, we adjusted our concentration predictions with simulated values of expected percentage errors. First, we collected retrospectively observed mean percentage errors as described in *Population model diagnostics*. These were computed for each PK model with 0, 1 and 2 modeled concentrations that include individuals with at least 1, 2 or >2 available concentrations, respectively. Corresponding distribution parameters were estimated by fitting the values with a log-normal distribution from which 1,000 values were simulated. Beforehand, distributional assumptions were checked with Kolmogorov-Smirnov test. Therefore, simulated concentrations were scaled with model-specific log-normally distributed values that reflect expected biases in predictions. Adjustment of DosOpt concentration simulations by PE was performed according to the rearrangement of the prediction error equation:  $obs_i = \frac{pred_i}{(1 - MPE_i)}$ , where  $obs_i$  is the adjusted concentration,  $pred_i$  is the

DosOpt simulated concentration, and  $MPE_i$  is a simulated value from the distribution fit. The estimate for PTA is calculated as the proportion of adjusted concentration simulations as follows:  $PTA = \frac{100}{n} * \sum_i^n [ obs_i > \min(targetRange) \& obs_i < \max(targetRange) ]$ , with *targetRange* being the therapeutic target range.

## Results

### *External validation dataset*

External validation dataset consisted of 121 patients with 149 treatment episodes. A total of 309 time-concentration points were obtained. Patient characteristics together with treatment data are presented in Table 1A and Table 1B. There was a total of 149, 84 (56.4%), and 38 (25.5%) patient treatment episodes that had at least 1, 2, and >2 vancomycin time-concentration points available, respectively. One sample was a  $C_{\text{peak}}$  (0.3% of total), 291 were denoted as  $C_{\text{trough}}$  (94% of total) and the remaining were in-between.

### *Vancomycin PK models*

Our initial search identified 96 publications. A manual review of the abstracts for these publications (performed by RK and TT) identified 24 individual studies with PK model specifications. Further filtering identified nine PK models that satisfied the inclusion criteria for original research articles (Fig. 1) [11,18–21,23–26]. Three additional models [16,17,22] were identified from review articles by Zhao *et al.* and Marsot *et al.* [30,42]. Characteristics of the models and their study populations are summarized in Electronic Supplementary Table 1.

There were several issues and ramifications regarding the models selected. First, we selected the independent vancomycin reference model and not the amikacin covariate model from De Cock *et al.* [18]. In the study by Seay *et al.* [25], no differences were reported between the 1 and 2-compartmental models. Therefore, we included the 1-compartmental model for simplicity. Since our initial simulations indicated significantly lower PTA values when a renal function component was included, the Allegaert *et al.* and Anderson *et al.* models were simplified by assuming normal renal function, i.e., a value of one [16,17]. None of the external dataset patients received spironolactone or amoxicillin-clavulanic acid which were included as covariates in the Marques-Minana *et al.* model [21]. Patient height data were

required for the Bhongsatiern *et al.* model but were not recorded in the external dataset. They were derived from Fenton growth charts based on current body weights and PNA [19,43]. These charts were also used to define SGA patients with the limit set at the 10% weight quantile for GA.

### *Population model diagnostics*

Population-model prediction diagnostics showed discordances of all models with our external data dataset (Fig. S1). Mean NPDE values were unbiased (Bonferroni corrected p-value threshold 0.004, n = 12) in Kimura *et al.*, De Cock *et al.*, Marques-Minana *et al.* and Zhao *et al.* models (Electronic Supplementary Table 2) [18,20,21,24]. However, we observed larger variances than expected for all models indicating worse than expected precision. Variance of Marques-Minana *et al.* NPDE values were lower than others (Fig. 2).

Inclusion of individual concentration observations improved the goodness of fit of all the PK models. Modelling with individual concentrations always reduced median individual MPE values towards zero and decreased MAPE values compared to population-based predictions (Table 2). Moreover, fits of observed and predicted concentrations showed increases in the explained proportion of variability to 74% on average (Table 2, Fig. S2). This represents a 38% improvement by inclusion of all available concentrations.

### *Bayesian diagnostics*

Medians of APE estimated with all population models were above 31%. Population-based PEs were consistently closer to zero (t-test, P = 0.006) in all assayed patients (n = 149) compared to its subgroup with >2 concentration measurements (n = 38). Precision estimates improved when at least a single concentration (n = 84) was included in estimation, as demonstrated by decreased APE values (t-test, P = 5E-4) below 25% for seven models.

Accuracy also improved as concentration inclusion approximated all models' PE values towards zero (Fig. 3). Inclusion of a second concentration ( $n = 38$ ) did not induce statistically significant changes to PEs or APEs, regardless of nominal improvement. Results of Bayesian diagnostics are reported in Electronic Supplementary Table 3.

No model attained more than 50% of the PEs within 30% of the true values with no concentration data. The upper limit within 20% was 36.2% with Lo *et al.* [23]. However, predictions including a single concentration obtained more than 50% within 30% in 8 out of 12 models, the highest F30 value was 68% with Marques-Minana *et al.* model [21]. Correspondingly, six models attained more than 40% within 20% of the PEs (Electronic Supplementary Table 3).

#### *Probability of target attainment simulations*

None of the condition-specific error collections used in the adjustment of DosOpt simulated concentrations differed statistically from log-normal distribution (Electronic Supplementary Table 4, Fig. S3). The PTAs for both the 10–15 mg/L and 10–20 mg/L target ranges exceeded the base model estimates (12 models;  $n = 149$ ) when at least one concentration guided the PK parameter estimation ( $n = 84$ ). When predictions were made based on two prior concentrations ( $n = 38$ ), the model-wise PTA estimates remained similar, with attainment probabilities approximately 40% and 60% within 10–15 mg/L and 10–20 mg/L of  $C_{\text{trough}}$ , respectively (Electronic Supplementary Table 5; Fig. 4).

For example, we observed that a single individual concentration improved the average individual PTAs in the Zhao *et al.* model from 31.6% to 40.4% for target 10–15 mg/L (Fig. 4A) and from 50.4% to 62.9% for target 10–20 mg/L (Fig. 4B). Simulations based on other models also attained relative improvements of around 25% from the population-based

predictions. This implies that inclusion of individual concentrations to models with more accurate initial attainment leads to improved achievable PTA.

## Discussion

To the best of our knowledge, this is the first study that compares vancomycin models in neonates whilst also considering individual concentrations in kinetics re-estimation. All published PK models were found biased in population-model based validation but both precision and accuracy improved when including individual concentrations were included. Bayesian inclusion enabled the best performing models to attain around 60% of the concentration predictions within  $\pm 30\%$  of the actually measured concentrations. Observed concentration prediction accuracies translated into highly variable simulated target attainment rates, the best performing models achieving around 40% for  $C_{trough}$  10-15 mg/L and 63% for 10-20 mg/L. These results describe the prediction performances attainable with current models and highlight the importance of model selection for TDM applications like DosOpt. Models underlying precision-based dosing approaches need to be reliably applicable to new populations [32]. Published neonatal vancomycin population PK models have been validated to a different extent. Using an external dataset, we showed that population based NPDE variances were statistically different from expected values in all tested models. Population-based validation of Zhao *et al.* (n = 78) [30] reported similar replication difficulties with only PK models by Grimsley and Thomson and Capparelli *et al.* (did not qualify for this study due to cohort PNA dissimilarity) passing NPDE mean and variance qualification [26,44]. Still, their reported NPDE results were dependent on the assay method used for concentration measurements. This highlights the importance of multiple replications, differences in replication cohorts and complexities of model transferability.

All included models assumed linear PK. Only one [18] was two-compartmental, the rest assumed a single compartment. Uniform model structure limits the feasibility of developing a new population model on our data for component importance assessment. In terms of covariates, all models contained a variable to represent patient age (postnatal, postmenstrual or gestational) and weight (current / birth). The effect of attributes such as creatinine, concomitant medications and artificial ventilation is inconclusive and variably used in models [45]. We hypothesise that continuous dosing used only by Zhao *et al.* and higher similarity of patient age and weights to our retrospective set exemplified by full range cover by Frymoyer *et al.* and Zhao *et al.* [11,20] may have contributed towards improved predictions in our study. However, the small number of evaluated models would leave any attempt at single variable effect estimation statistically under-powered. We also note that two models with consistently the worst predictive accuracy (Seay *et al.* [25], Grimsley and Thomson [26]) were also two of chronologically the oldest. This is a possible indication of improving model development practices.

Large unexplained and inter-individual PK variability of vancomycin in neonates have a negative effect on resulting prediction accuracy. This is illustrated by relatively large residual model component values (Electronic Supplementary Table 1). For example, Zhao *et al.* reported combined error model parameter sizes of 2.28 mg/L for the additive component and 20.3% for the proportional component [20] which add to reported between-subject variability. Individual concentrations help in explaining some uncertainty, but most models still predicted with an absolute error of 20-30% after inclusion of 1 or 2 concentrations. One likely cause is the often un-characterised within-subject PK variability. Another issue would be the failure to incorporate significant covariates in PK models. The extent of such contributory but missing terms is currently unknown as no studies have attempted to partition vancomycin concentration variability into biological and environmental. Nevertheless, identification of

novel terms with small effects would require much higher sample sizes than are currently available.

We chose vancomycin  $C_{\text{trough}}$  ranges of 10-15 mg/L and 10-20 mg/L as the therapeutic targets of PTA simulations as these provide both therapeutic effectiveness and the utility and usefulness in clinical settings. In an experimental study, Ramos-Martin *et al.* suggested that a AUC/MIC higher than 400 is necessary for successful eradication of coagulase negative staphylococci (CoNS)[46]. Padari *et al.* could not correlate AUC/MIC >400 with increased efficacy in neonates treated for CoNS-related bloodstream infections [47]. Studies evaluating the relationship of trough concentration ( $C_{\text{trough}}$ ) with AUC have shown that the two measures are not perfect substitutes [7] but relative ease of  $C_{\text{trough}}$  measurement makes it commonly used for vancomycin therapeutic targeting in guidelines and in clinics [8–10]. Whereas attainment of 10 mg/L  $C_{\text{trough}}$  has been multiply linked with AUC>400 in paediatric populations [11–15], the estimates on the non-toxic upper end of the PD target ranges are less conclusive and warrant future work. Increased probability of nephrotoxicity has been associated with AUC values exceeding 700 mg\*h/L [7,48]. Similarly, some evidence relates  $C_{\text{trough}} >20$  mg/L to increased toxicity [49].

Previous assessments of targeted dose adjustment methods have demonstrated the benefit of population PK and Bayesian-based models versus empirical approaches. Compared to the 25.1% of patients achieving 10–20 mg/L  $C_{\text{troughs}}$  with empirical dosing in a study by Ringelberg [8], Leroux *et al.* reported 72% of patients consistently achieving 15–25 mg/L troughs when the Zhao *et al.* model was used for dose calculations [9]. In a study by Nunn *et al.* [10], Bayesian adjustments resulted in an improvement from 33.8% of patients to 75.0% of patients having a  $C_{\text{trough}}$  of 10–20 mg/L over the course of a full treatment period. Several *in silico* studies have further showed that Bayesian kinetics estimates improve with the inclusion of additional individual TDM data [10,34,50]. The above studies use a variety of different

study designs and  $C_{\text{trough}}$  ranges to report PTA results, which complicates between-study comparisons. Our simulations similarly showed that inclusion of individual concentrations improved model-wise attainment rates of clinically applicable therapeutic  $C_{\text{trough}}$  ranges. Inclusion of a single concentration increased the PTA for an average patient from 20–30% to 35–40% in target range 10–15 mg/L (Fig. 3A), and from 35–43% to 55–63% in 10–20 mg/L target range. Firstly, these indicate that development of general Bayesian-guided bedside TDM applications like DosOpt, are beneficial to dose adjustment accuracy. Secondly, the probabilistic attainment of vancomycin therapeutic targets with current models would not provide outcome certainty in the form of PTA values around and above 90% [34].

The present study has several limitations. We did not evaluate concentration performances within patient's condition severity subgroups, which may have had an unknown effect. The precision of Bayesian parameter estimation may have been influenced by several confounding factors. First, all our samples were assayed using FPIA. Measurement errors and minimal quantifiable concentrations may have varied between our data and in those used for assessed models. Secondly, our samples were overwhelmingly  $C_{\text{trough}}$ . Also, our retrospective dataset consisted of patients with uneven number of available concentrations in comparison groups that complicated comparisons between groups. To assess this effect, we performed additional performance evaluations with 0 and 1 included concentrations for patients with >2 total available concentrations ( $n = 38$ ), and 0 concentrations for all patients with 2 available concentrations ( $n = 84$ ).

## Conclusion

Predictions based on previously published vancomycin PK models exhibited considerable performance variability. All population based model predictions were discordant with external validation dataset. However, when at least one treatment concentration was included, both



precision and accuracy of predictions improved. Still, relatively low predictive precision of current population models limits attainment of narrow therapeutic targets of vancomycin.

## **Notes**

### *Acknowledgments*

This work was supported by institutional research funding grants (IUT34-24) and (IUT34-4). Support from the European Union was also provided through the European Regional Development Fund. We would like to thank Helgi Padari for help with data collection and Hiie Soeorg for constructive comments.

### *Conflict of interest*

The authors declare no conflict of interests. The authors declare no support from any organization for the submitted work, no financial relationships with any organizations that might have an interest in the submitted work in the previous 3 years, and no other relationships or activities that might have influenced the submitted work.

### *Author contributors*

TT, TM, and IL designed the study. TT, JV, TM, IL, and RK participated in writing of the manuscript. TT performed the statistical analyses and simulations. TM, RK, and IL contributed and collected the data. JV and IL provided the funding. All authors reviewed the manuscript and approved the final version.

### *Compliance with ethical standards*

This study was conducted in accordance of good ethical standards. The Ethics Committee of the University of Tartu approved the study in Protocol No. 256/T-23. Ethics committee waived informed consent as the study was retrospectively performed with anonymized data.

## References

1. Jacqz-Aigrain E, Zhao W, Sharland M, van den Anker JN. Use of antibacterial agents in the neonate: 50 years of experience with vancomycin administration. *Semin Fetal Neonatal Med.* 2013;18:28–34.
2. Rybak M, Lomaestro B, Rotschafer JC, Moellering R, Craig W, Billeter M, et al. Therapeutic monitoring of vancomycin in adult patients: a consensus review of the American Society of Health-System Pharmacists, the Infectious Diseases Society of America, and the Society of Infectious Diseases Pharmacists. *Am J Health-Syst Pharm AJHP Off J Am Soc Health-Syst Pharm.* 2009;66:82–98.
3. Ye Z-K, Tang H-L, Zhai S-D. Benefits of Therapeutic Drug Monitoring of Vancomycin: A Systematic Review and Meta-Analysis. *PLOS ONE.* 2013;8:e77169.
4. Giuliano C, Haase KK, Hall R. Use of vancomycin pharmacokinetic–pharmacodynamic properties in the treatment of MRSA infections. *Expert Rev Anti Infect Ther.* 2010;8:95–106.
5. Rodvold KA, Everett JA, Pryka RD, Kraus DM. Pharmacokinetics and administration regimens of vancomycin in neonates, infants and children. *Clin Pharmacokinet.* 1997;33:32–51.
6. Kishk OA, Lardieri AB, Heil EL, Morgan JA. Vancomycin AUC/MIC and Corresponding Troughs in a Pediatric Population. *J Pediatr Pharmacol Ther JPPT.* 2017;22:41–7.
7. Neely MN, Youn G, Jones B, Jelliffe RW, Drusano GL, Rodvold KA, et al. Are vancomycin trough concentrations adequate for optimal dosing? *Antimicrob Agents Chemother.* 2014;58:309–16.
8. Ringenberg T, Robinson C, Meyers R, Degnan L, Shah P, Siu A, et al. Achievement of Therapeutic Vancomycin Trough Serum Concentrations with Empiric Dosing in Neonatal Intensive Care Unit Patients. *Pediatr Infect Dis J.* 2015;34:742–7.
9. Leroux S, Jacqz-Aigrain E, Biran V, Lopez E, Madeleneau D, Wallon C, et al. Clinical Utility and Safety of a Model-Based Patient-Tailored Dose of Vancomycin in Neonates. *Antimicrob Agents Chemother.* 2016;60:2039–42.
10. Nunn MO, Corallo CE, Aubron C, Poole S, Dooley MJ, Cheng AC. Vancomycin dosing: assessment of time to therapeutic concentration and predictive accuracy of pharmacokinetic modeling software. *Ann Pharmacother.* 2011;45:757–63.
11. Frymoyer A, Hersh AL, El-Komy MH, Gaskari S, Su F, Drover DR, et al. Association between vancomycin trough concentration and area under the concentration-time curve in neonates. *Antimicrob Agents Chemother.* 2014;58:6454–61.
12. Le J, Bradley JS, Murray W, Romanowski GL, Tran TT, Nguyen N, et al. Improved vancomycin dosing in children using area under the curve exposure. *Pediatr Infect Dis J.* 2013;32:e155-163.
13. Chen Y, Wu D, Dong M, Zhu Y, Lu J, Li X, et al. Population pharmacokinetics of vancomycin and AUC-guided dosing in Chinese neonates and young infants. *Eur J Clin Pharmacol.* 2018;74:921–30.

14. Tseng S-H, Lim CP, Chen Q, Tang CC, Kong ST, Ho PC-L. Evaluating the Relationship between Vancomycin Trough Concentration and 24-Hour Area under the Concentration-Time Curve in Neonates. *Antimicrob Agents Chemother.* 2018;AAC.01647-17.
15. Tkachuk S, Collins K, Ensom MHH. The Relationship Between Vancomycin Trough Concentrations and AUC/MIC Ratios in Pediatric Patients: A Qualitative Systematic Review. *Paediatr Drugs.* 2018;20:153–64.
16. Anderson BJ, Allegaert K, Van den Anker JN, Cossey V, Holford NHG. Vancomycin pharmacokinetics in preterm neonates and the prediction of adult clearance. *Br J Clin Pharmacol.* 2007;63:75–84.
17. Allegaert K, Anderson BJ, van den Anker JN, Vanhaesebrouck S, de Zegher F. Renal drug clearance in preterm neonates: relation to prenatal growth. *Ther Drug Monit.* 2007;29:284–91.
18. De Cock RFW, Allegaert K, Sherwin CMT, Nielsen EI, de Hoog M, van den Anker JN, et al. A neonatal amikacin covariate model can be used to predict ontogeny of other drugs eliminated through glomerular filtration in neonates. *Pharm Res.* 2014;31:754–67.
19. Bhongsatiern J, Stockmann C, Roberts JK, Yu T, Korgenski KE, Spigarelli MG, et al. Evaluation of Vancomycin Use in Late-Onset Neonatal Sepsis Using the Area Under the Concentration-Time Curve to the Minimum Inhibitory Concentration  $\geq 400$  Target. *Ther Drug Monit.* 2015;37:756–65.
20. Zhao W, Lopez E, Biran V, Durrmeyer X, Fakhoury M, Jacqz-Aigrain E. Vancomycin continuous infusion in neonates: dosing optimisation and therapeutic drug monitoring. *Arch Dis Child.* 2013;98:449–53.
21. Marqués-Miñana M-R, Saadeddin A, Peris J-E. Population pharmacokinetic analysis of vancomycin in neonates. A new proposal of initial dosage guideline. *Br J Clin Pharmacol.* 2010;70:713–20.
22. Oudin C, Vialet R, Boulamery A, Martin C, Simon N. Vancomycin prescription in neonates and young infants: toward a simplified dosage. *Arch Dis Child Fetal Neonatal Ed.* 2011;96:F365-370.
23. Lo Y-L, van Hasselt JGC, Heng S-C, Lim C-T, Lee T-C, Charles BG. Population pharmacokinetics of vancomycin in premature Malaysian neonates: identification of predictors for dosing determination. *Antimicrob Agents Chemother.* 2010;54:2626–32.
24. Kimura T, Sunakawa K, Matsuura N, Kubo H, Shimada S, Yago K. Population Pharmacokinetics of Arbekacin, Vancomycin, and Panipenem in Neonates. *Antimicrob Agents Chemother.* 2004;48:1159–67.
25. Seay RE, Brundage RC, Jensen PD, Schilling CG, Edgren BE. Population pharmacokinetics of vancomycin in neonates. *Clin Pharmacol Ther.* 1994;56:169–75.
26. Grimsley C, Thomson A. Pharmacokinetics and dose requirements of vancomycin in neonates. *Arch Dis Child Fetal Neonatal Ed.* 1999;81:F221–7.

27. Zhao W, Kaguelidou F, Biran V, Zhang D, Allegaert K, Capparelli EV, et al. External Evaluation of Population Pharmacokinetic Models of Vancomycin in Neonates: The transferability of published models to different clinical settings. *Br J Clin Pharmacol*. 2013;75:1068–80.
28. Janssen EJH, Väitalo PAJ, Allegaert K, de Cock RFW, Simons SHP, Sherwin CMT, et al. Towards Rational Dosing Algorithms for Vancomycin in Neonates and Infants Based on Population Pharmacokinetic Modeling. *Antimicrob Agents Chemother*. 2016;60:1013–21.
29. Stockmann C, Hersh AL, Roberts JK, Bhongsatiern J, Korgenski EK, Spigarelli MG, et al. Predictive Performance of a Vancomycin Population Pharmacokinetic Model in Neonates. *Infect Dis Ther*. 2015;4:187–98.
30. Zhao W, Kaguelidou F, Biran V, Zhang D, Allegaert K, Capparelli EV, et al. External Evaluation of Population Pharmacokinetic Models of Vancomycin in Neonates: The transferability of published models to different clinical settings. *Br J Clin Pharmacol*. 2013;75:1068–80.
31. Wilbaux M, Fuchs A, Samardzic J, Rodieux F, Csajka C, Allegaert K, et al. Pharmacometric Approaches to Personalize Use of Primarily Renally Eliminated Antibiotics in Preterm and Term Neonates. *J Clin Pharmacol*. 2016;56:909–35.
32. Neely M, Jelliffe R. Practical, individualized dosing: 21st century therapeutics and the clinical pharmacometrician. *J Clin Pharmacol*. 2010;50:842–7.
33. Frymoyer A, Stockmann C, Hersh AL, Goswami S, Keizer RJ. Individualized Empiric Vancomycin Dosing in Neonates Using a Model-Based Approach. *J Pediatr Infect Dis Soc*. 2017;
34. Tasa T, Metsvaht T, Kalamees R, Vilo J, Lutsar I. DosOpt: A Tool for Personalized Bayesian Dose Adjustment of Vancomycin in Neonates. *Ther Drug Monit*. 2017;39:604–13.
35. Neely M, Philippe M, Rushing T, Fu X, van Guilder M, Bayard D, et al. Accurately Achieving Target Busulfan Exposure in Children and Adolescents With Very Limited Sampling and the BestDose Software. *Ther Drug Monit*. 2016;38:332–42.
36. Wicha SG, Kees MG, Solms A, Minichmayr IK, Kratzer A, Kloft C. TDMx: a novel web-based open-access support tool for optimising antimicrobial dosing regimens in clinical routine. *Int J Antimicrob Agents*. 2015;45:442–4.
37. Zhao C, Jiao Z, Mao J, Qiu X. External evaluation of published population pharmacokinetic models of tacrolimus in adult renal transplant recipients. *Br J Clin Pharmacol*. 2016;81:891–907.
38. Mao J-J, Jiao Z, Yun H-Y, Zhao C-Y, Chen H-C, Qiu X-Y, et al. External evaluation of population pharmacokinetic models for ciclosporin in adult renal transplant recipients. *Br J Clin Pharmacol*. 2018;84:153–71.
39. Young T, Mangum BN. *A Manual of Drugs used in neonatal care*. Antimicrob Ed 23rd Thomson Reuters Montvale. 2010;7645:42–43.

40. R Core Team. R: A Language and Environment for Statistical Computing [Internet]. Vienna, Austria: R Foundation for Statistical Computing; 2017. Available from: <https://www.R-project.org/>
41. Post TM, Freijer JI, Ploeger BA, Danhof M. Extensions to the Visual Predictive Check to facilitate model performance evaluation. *J Pharmacokinet Pharmacodyn*. 2008;35:185–202.
42. Marsot A, Boulamery A, Bruguerolle B, Simon N. Vancomycin: a review of population pharmacokinetic analyses. *Clin Pharmacokinet*. 2012;51:1–13.
43. Fenton TR, Kim JH. A systematic review and meta-analysis to revise the Fenton growth chart for preterm infants. *BMC Pediatr*. 2013;13:59.
44. Capparelli EV, Lane FR, Romanowski GL, McFeely EJ, Murray W, Sousa P, et al. The Influences of Renal Function and Maturation on Vancomycin Elimination in Newborns and Infants. *J Clin Pharmacol*. 2001;41:927–34.
45. Pacifici GM, Allegaert K. Clinical pharmacokinetics of vancomycin in the neonate: a review. *Clin Sao Paulo Braz*. 2012;67:831–7.
46. Ramos-Martín V, Johnson A, Livermore J, McEntee L, Goodwin J, Whalley S, et al. Pharmacodynamics of vancomycin for CoNS infection: experimental basis for optimal use of vancomycin in neonates. *J Antimicrob Chemother*. 2016;71:992–1002.
47. Padari H, Oselin K, Tasa T, Metsvaht T, Lõivukene K, Lutsar I. Coagulase negative staphylococcal sepsis in neonates: do we need to adapt vancomycin dose or target? *BMC Pediatr*. 2016;16:206.
48. Suzuki Y, Kawasaki K, Sato Y, Tokimatsu I, Itoh H, Hiramatsu K, et al. Is peak concentration needed in therapeutic drug monitoring of vancomycin? A pharmacokinetic-pharmacodynamic analysis in patients with methicillin-resistant staphylococcus aureus pneumonia. *Chemotherapy*. 2012;58:308–12.
49. Lodise TP, Patel N, Lomaestro BM, Rodvold KA, Drusano GL. Relationship between initial vancomycin concentration-time profile and nephrotoxicity among hospitalized patients. *Clin Infect Dis Off Publ Infect Dis Soc Am*. 2009;49:507–14.
50. Hiraki Y, Onga T, Mizoguchi A, Tsuji Y. Investigation of the prediction accuracy of vancomycin concentrations determined by patient-specific parameters as estimated by Bayesian analysis. *J Clin Pharm Ther*. 2010;35:527–32.

## Tables

**Table 1**

Demographic and clinical patient data

**(A) Patient attributes (n = 149)**

| Variable (unit)           | Mean (Range)     | Frequencies by attribute ranges |
|---------------------------|------------------|---------------------------------|
| Postmenstrual age (weeks) | 31.7 (24.6-53.1) | <28: 38                         |
|                           |                  | 28-33: 68                       |
|                           |                  | 33-38: 18                       |
|                           |                  | >38: 25                         |
| Birth weight (kg)         | 1.32 (0.45-4.82) | <0.8: 56                        |
|                           |                  | 0.8-1.5: 56                     |
|                           |                  | 1.5-2.5: 17                     |
|                           |                  | >2.5: 20                        |
| Current weight (kg)       | 1.47 (0.46-5.23) | <0.8: 30                        |
|                           |                  | 0.8-1.5: 74                     |
|                           |                  | 1.5-2.5: 20                     |
|                           |                  | >2.5: 25                        |
| Postnatal age (days)      | 19.2 (4.18-90)   | <10: 55                         |
|                           |                  | 10-25: 60                       |
|                           |                  | 25-50: 23                       |
|                           |                  | >50: 11                         |
| Creatinine (µmol/L)       | 47.3 (18-116)    | <30: 35                         |
|                           |                  | 30-50: 54                       |
|                           |                  | 50-75: 47                       |
|                           |                  | 75-120: 13                      |

**(B)**

| Therapeutic interventions (n=149) | Inotropes | Respiratory support | Gentamicin | Ibuprofen |
|-----------------------------------|-----------|---------------------|------------|-----------|
| Count (%)                         | 81 (54)   | 132 (89)            | 64 (43)    | 15 (10)   |

**Table 2**

Mean percentage errors (MPE), mean absolute percentage errors (MAPE) and adjusted-R<sup>2</sup> of the 12 population pharmacokinetics model based predictions with and without inclusion of individual concentration data. Evaluations in “All data included” group combine all individual data points with population model information, whereas “No data included” uses only population model information

| <b>PK model</b>              |                         |                        |                      |                         |                        |                      |
|------------------------------|-------------------------|------------------------|----------------------|-------------------------|------------------------|----------------------|
|                              | All data included       |                        |                      | No data included        |                        |                      |
|                              | <b>Median MAPE (SE)</b> | <b>Median MPE (SE)</b> | <b>R<sup>2</sup></b> | <b>Median MAPE (SE)</b> | <b>Median MPE (SE)</b> | <b>R<sup>2</sup></b> |
| Allegaert <i>et al.</i>      | 0.167<br>(0.012)        | 0.084<br>(0.011)       | 0.753                | 0.418<br>(0.023)        | 0.281<br>(0.045)       | 0.296                |
| Anderson <i>et al.</i>       | 0.182<br>(0.012)        | 0.131<br>(0.008)       | 0.779                | 0.457<br>(0.019)        | 0.394<br>(0.027)       | 0.413                |
| Bhongsatiern <i>et al.</i>   | 0.246<br>(0.016)        | 0.156<br>(0.018)       | 0.72                 | 0.354<br>(0.024)        | 0.233<br>(0.034)       | 0.508                |
| De Cock <i>et al.</i>        | 0.169<br>(0.011)        | 0.061<br>(0.015)       | 0.606                | 0.35<br>(0.024)         | 0.246<br>(0.03)        | 0.236                |
| Frymoyer <i>et al.</i>       | 0.159<br>(0.011)        | 0.345<br>(0.022)       | 0.787                | 0.35<br>(0.022)         | 0.482<br>(0.028)       | 0.403                |
| Grimsley and Thomson         | 0.367<br>(0.018)        | 0.046<br>(0.022)       | 0.666                | 0.523<br>(0.021)        | 0.072<br>(0.049)       | 0.448                |
| Kimura <i>et al.</i>         | 0.209<br>(0.016)        | -0.087<br>(0.02)       | 0.739                | 0.399<br>(0.3)          | -0.209<br>(0.058)      | 0.352                |
| Lo <i>et al.</i>             | 0.173<br>(0.014)        | 0.057<br>(0.008)       | 0.706                | 0.396<br>(0.033)        | 0.233<br>(0.044)       | 0.198                |
| Marques-Minana <i>et al.</i> | 0.134<br>(0.011)        | 0.07<br>(0.007)        | 0.843                | 0.348<br>(0.022)        | 0.324<br>(0.032)       | 0.352                |
| Oudin <i>et al.</i>          | 0.165<br>(0.011)        | 0.014<br>(0.009)       | 0.789                | 0.409<br>(0.02)         | 0.191<br>(0.054)       | 0.418                |

|                    |                  |                   |       |                  |                   |       |
|--------------------|------------------|-------------------|-------|------------------|-------------------|-------|
| <i>Seay et al.</i> | 0.217<br>(0.015) | -0.196<br>(0.042) | 0.705 | 0.933<br>(0.084) | -0.912<br>(0.136) | 0.295 |
| <i>Zhao et al.</i> | 0.173<br>(0.012) | 0.083<br>(0.013)  | 0.776 | 0.319<br>(0.019) | 0.202<br>(0.036)  | 0.428 |



## Figure captions

**Fig. 1** Flowchart of the model selection process

**Fig. 2** Normalized prediction distribution error (NPDE) plots of the model by Marques-Minana *et al.* (2010). (A) histogram of the distribution of the NPDE against standardized gaussian distribution (semitransparent blue fields), (B) quantile–quantile plot of the NPDE against theoretical distribution (semitransparent blue fields), (C) NPDE vs. predicted concentrations (mg/L) (D) NPDE vs. Time (h). In plot C and D, the solid red line represents the median NPDE of the observations and the semitransparent red field represents a simulation–based 95% confidence interval (CI) for the median. Solid blue lines represent the NPDE of the observed 5th and 95th percentiles and semitransparent blue fields represent a simulation–based 95% CI for the corresponding model predicted percentiles. The NPDE of the observations are represented by blue circles

**Fig. 3** Boxplots of the concentration prediction percentage errors (PE) of 12 vancomycin population PK models. PE distributions are visualized in 3 subsets of individuals. All assayed individuals with at least 1 measured concentration ( $n = 149$ ) were used to predict the first concentration based on a population model. Subset of individuals with at least 2 concentrations ( $n = 84$ ) was used to predict the first and second concentrations based on 0 and 1 included individual concentrations, whereas prediction of the third concentration was included for individuals with at least 3 concentrations ( $n = 38$ ). Dashed lines denote 30% percentage errors

**Fig. 4** Probability of target attainment estimates with individual pharmacokinetics estimated with 0 ( $n = 149$ ), 1 ( $n = 84$ ), and 2 ( $n = 38$ ) individual concentrations entered in DosOpt. Each point represents the estimated maximal probability of attaining targeted trough concentrations

with an individually optimized dose. Simulations assume a dose administered from a baseline concentration of 10 mg/L with a 1-hour infusion and 8-hour interval. Targeted trough concentration ranges (A) 10-20 mg/L, (B) 10-15 mg/L

## **Supplementary Material**

Supplementary Material 1 – ESM1.pdf - captions of supplementary tables 1-5 and supplementary figures 1-3

Electronic Supplementary Table 1 – ESMTTable1.docx

Electronic Supplementary Table 2 – ESMTTable2.xlsx

Electronic Supplementary Table 3 – ESMTTable3.xlsx

Electronic Supplementary Table 4 – ESMTTable4.xlsx

Electronic Supplementary Table 5 – ESMTTable5.xlsx

Fig. S1 – ESMFig1.pdf

Fig. S2 – ESMFig2.pdf

Fig. S3 – ESMFig3.pdf

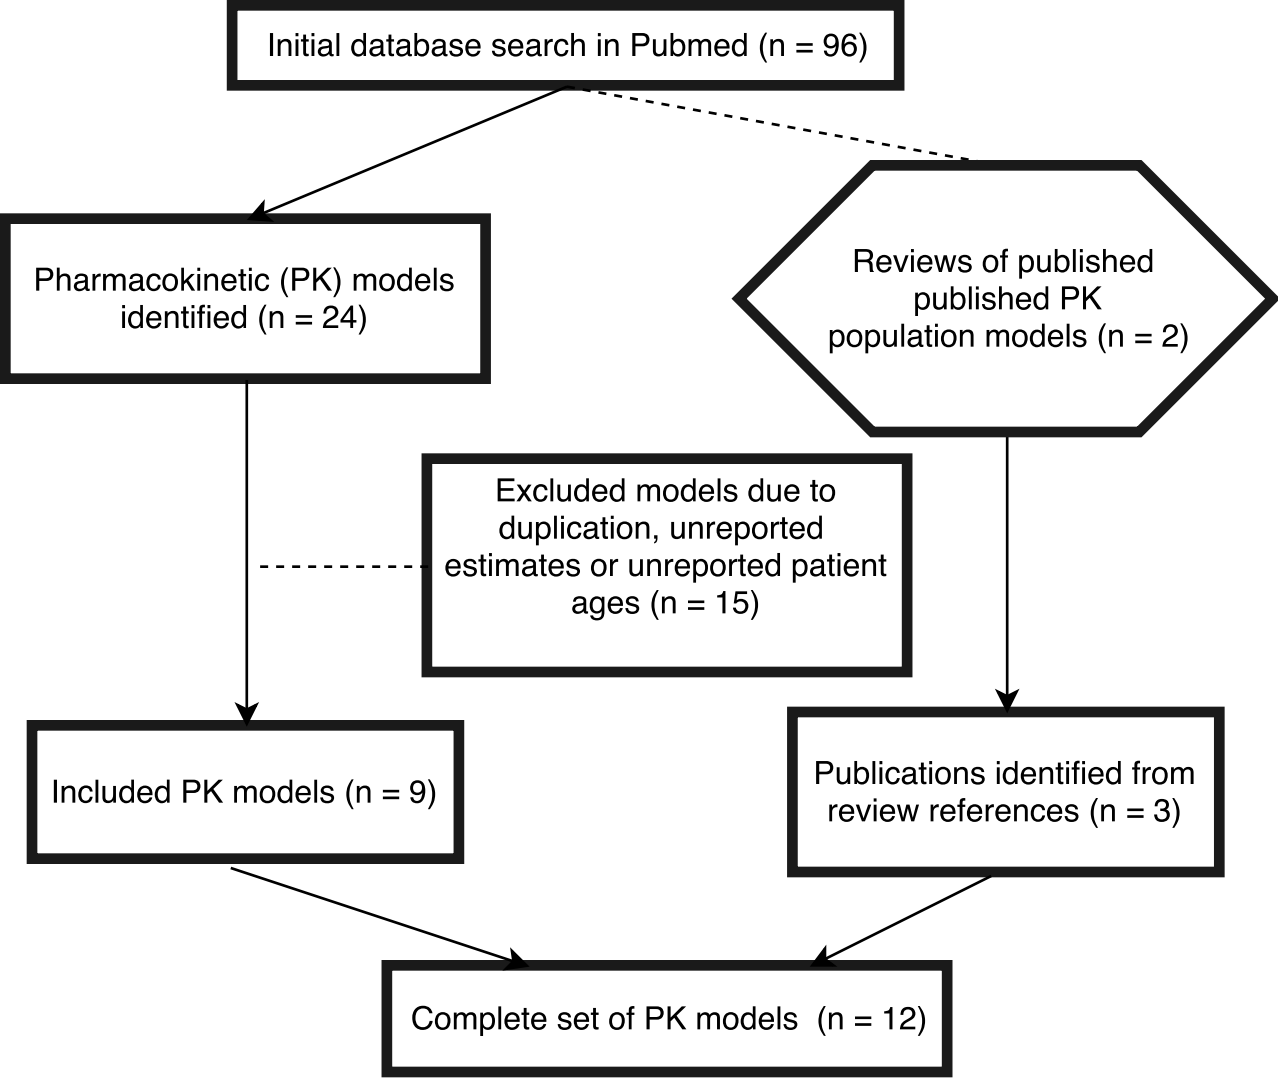

Marques–Minana et al.

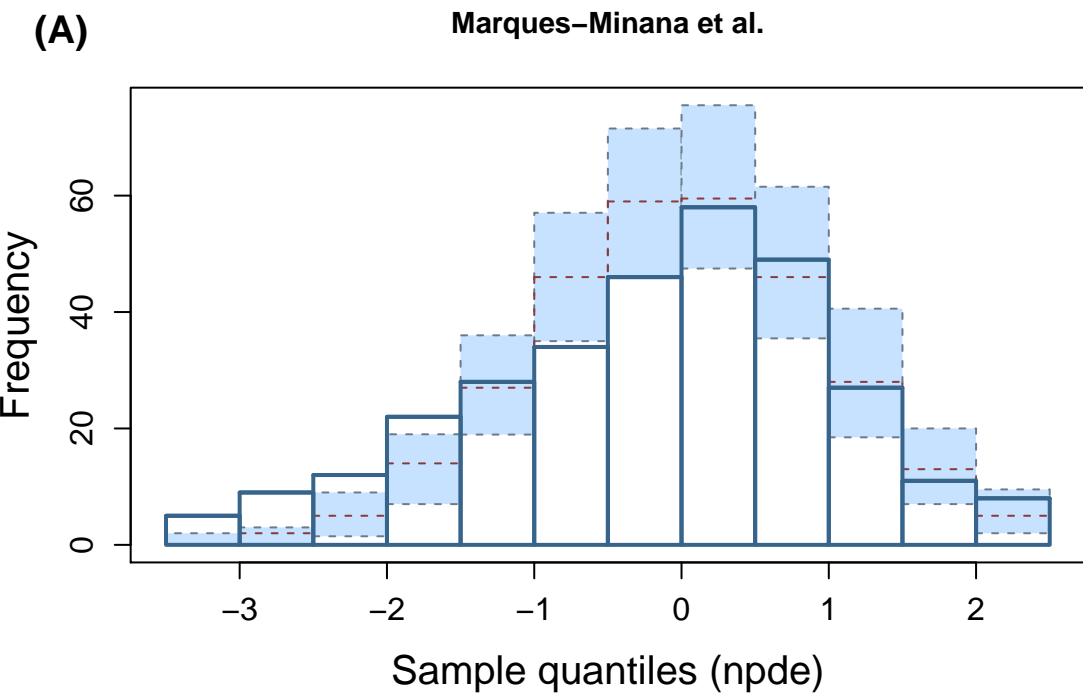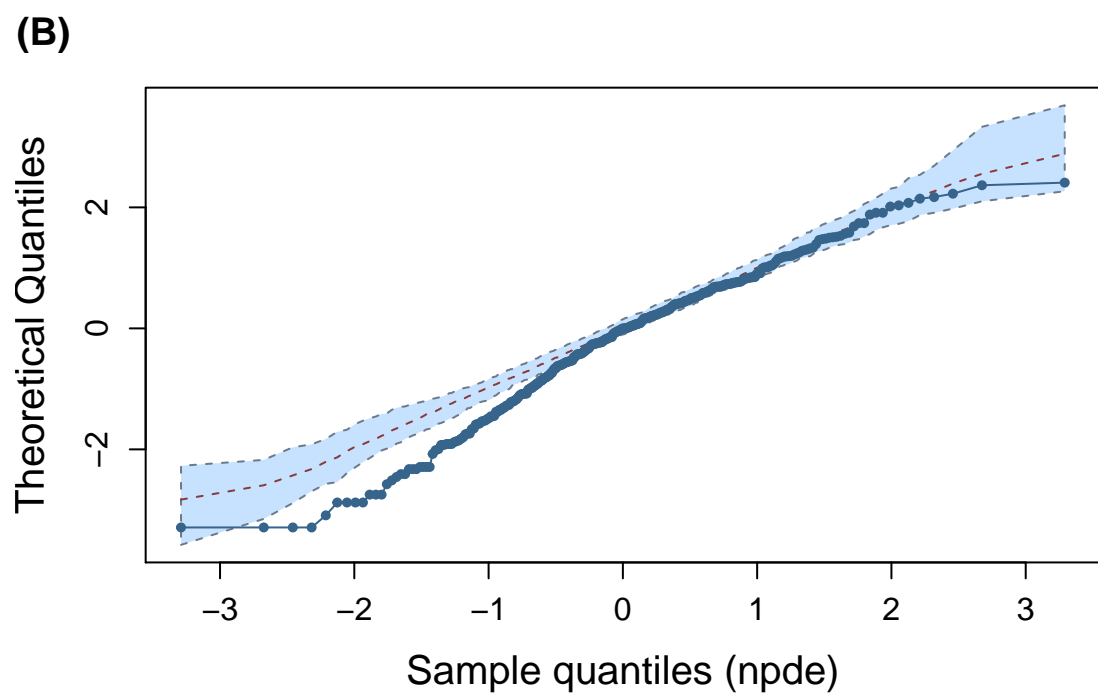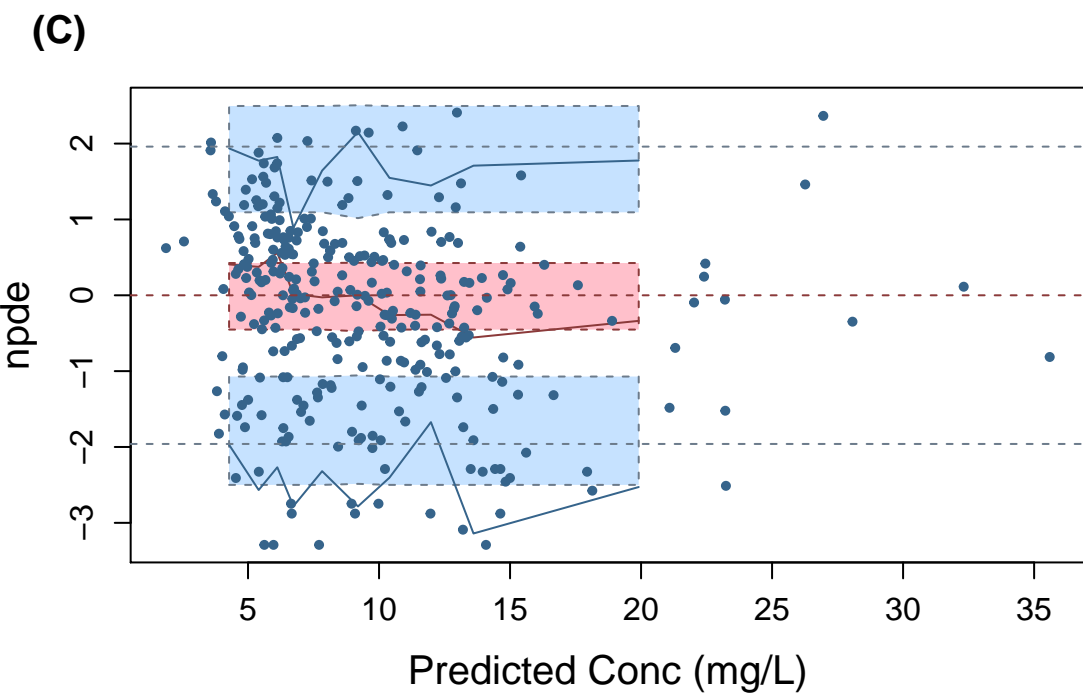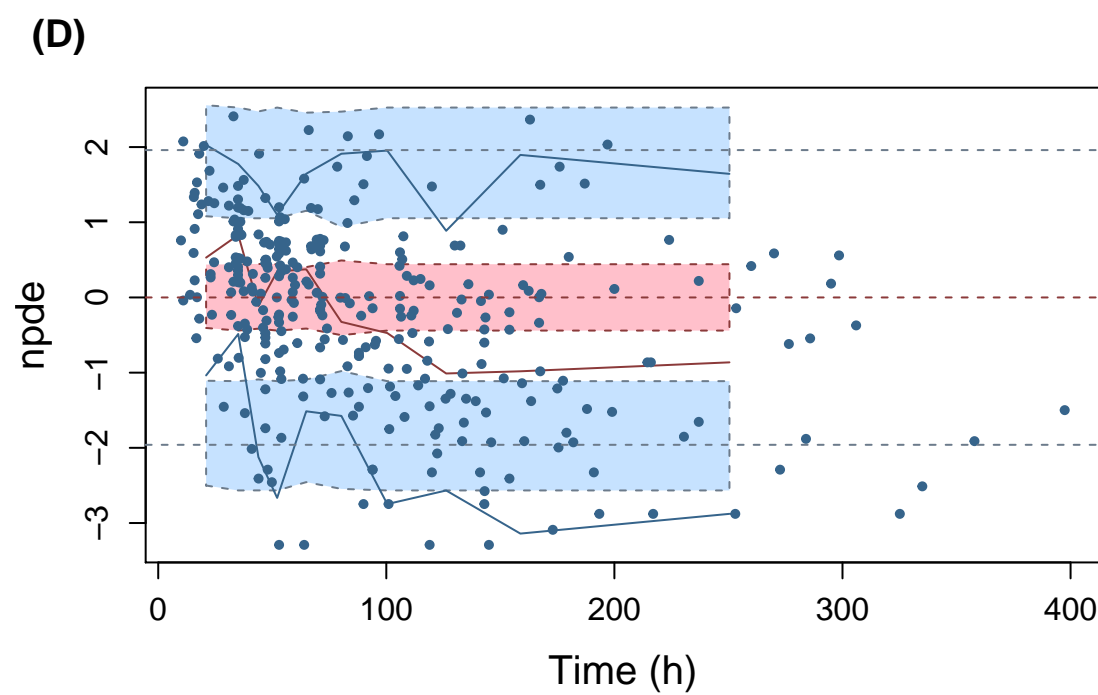

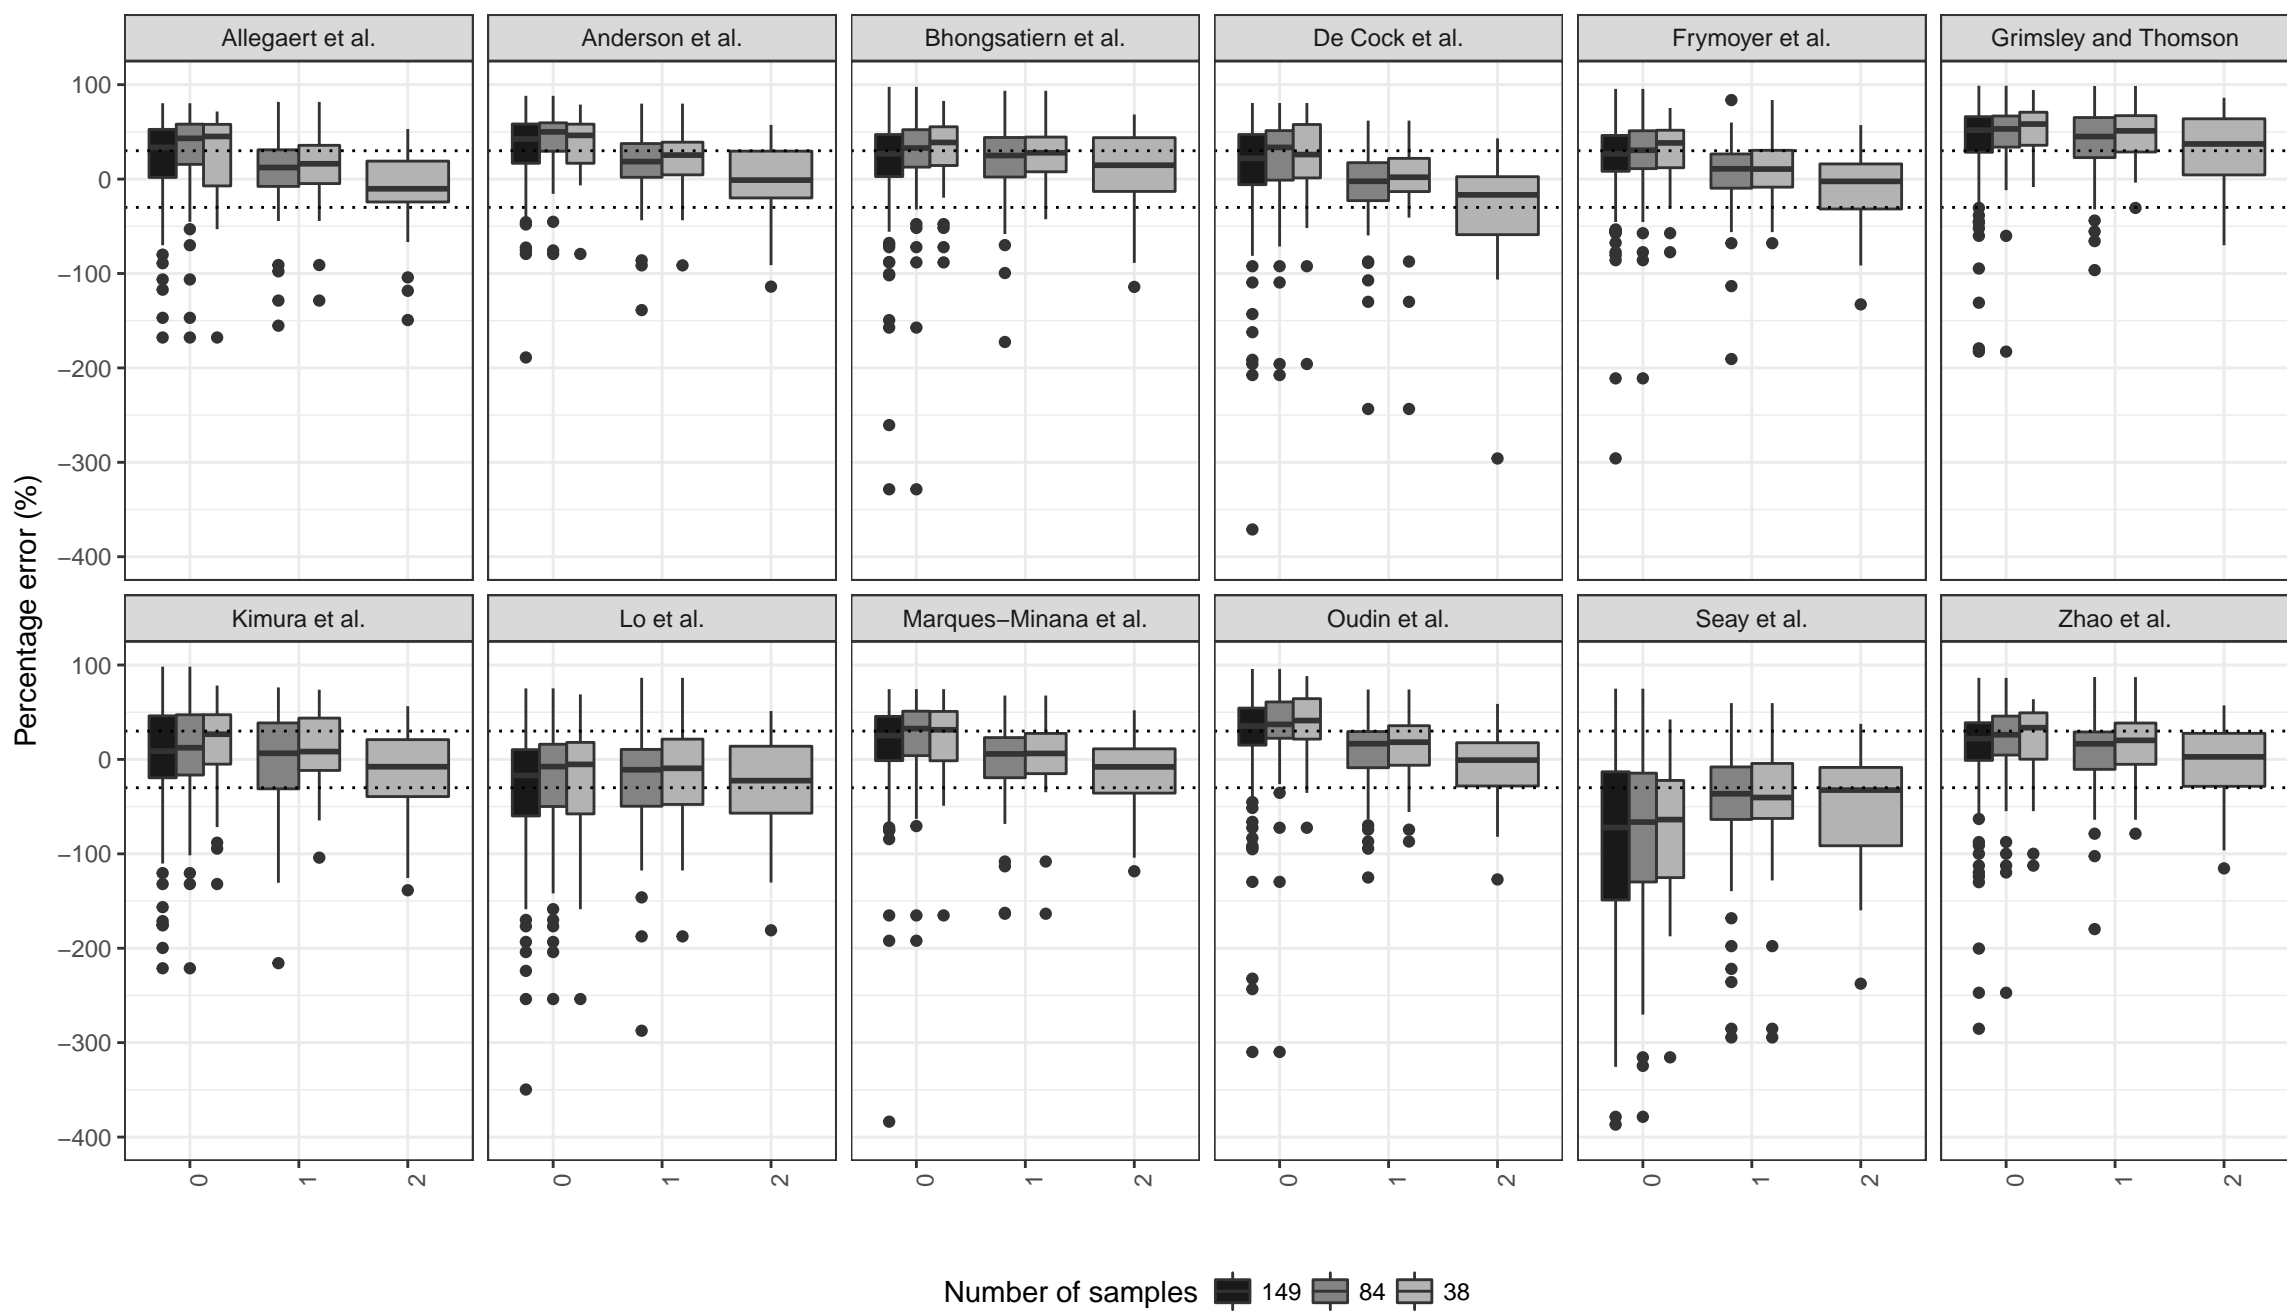

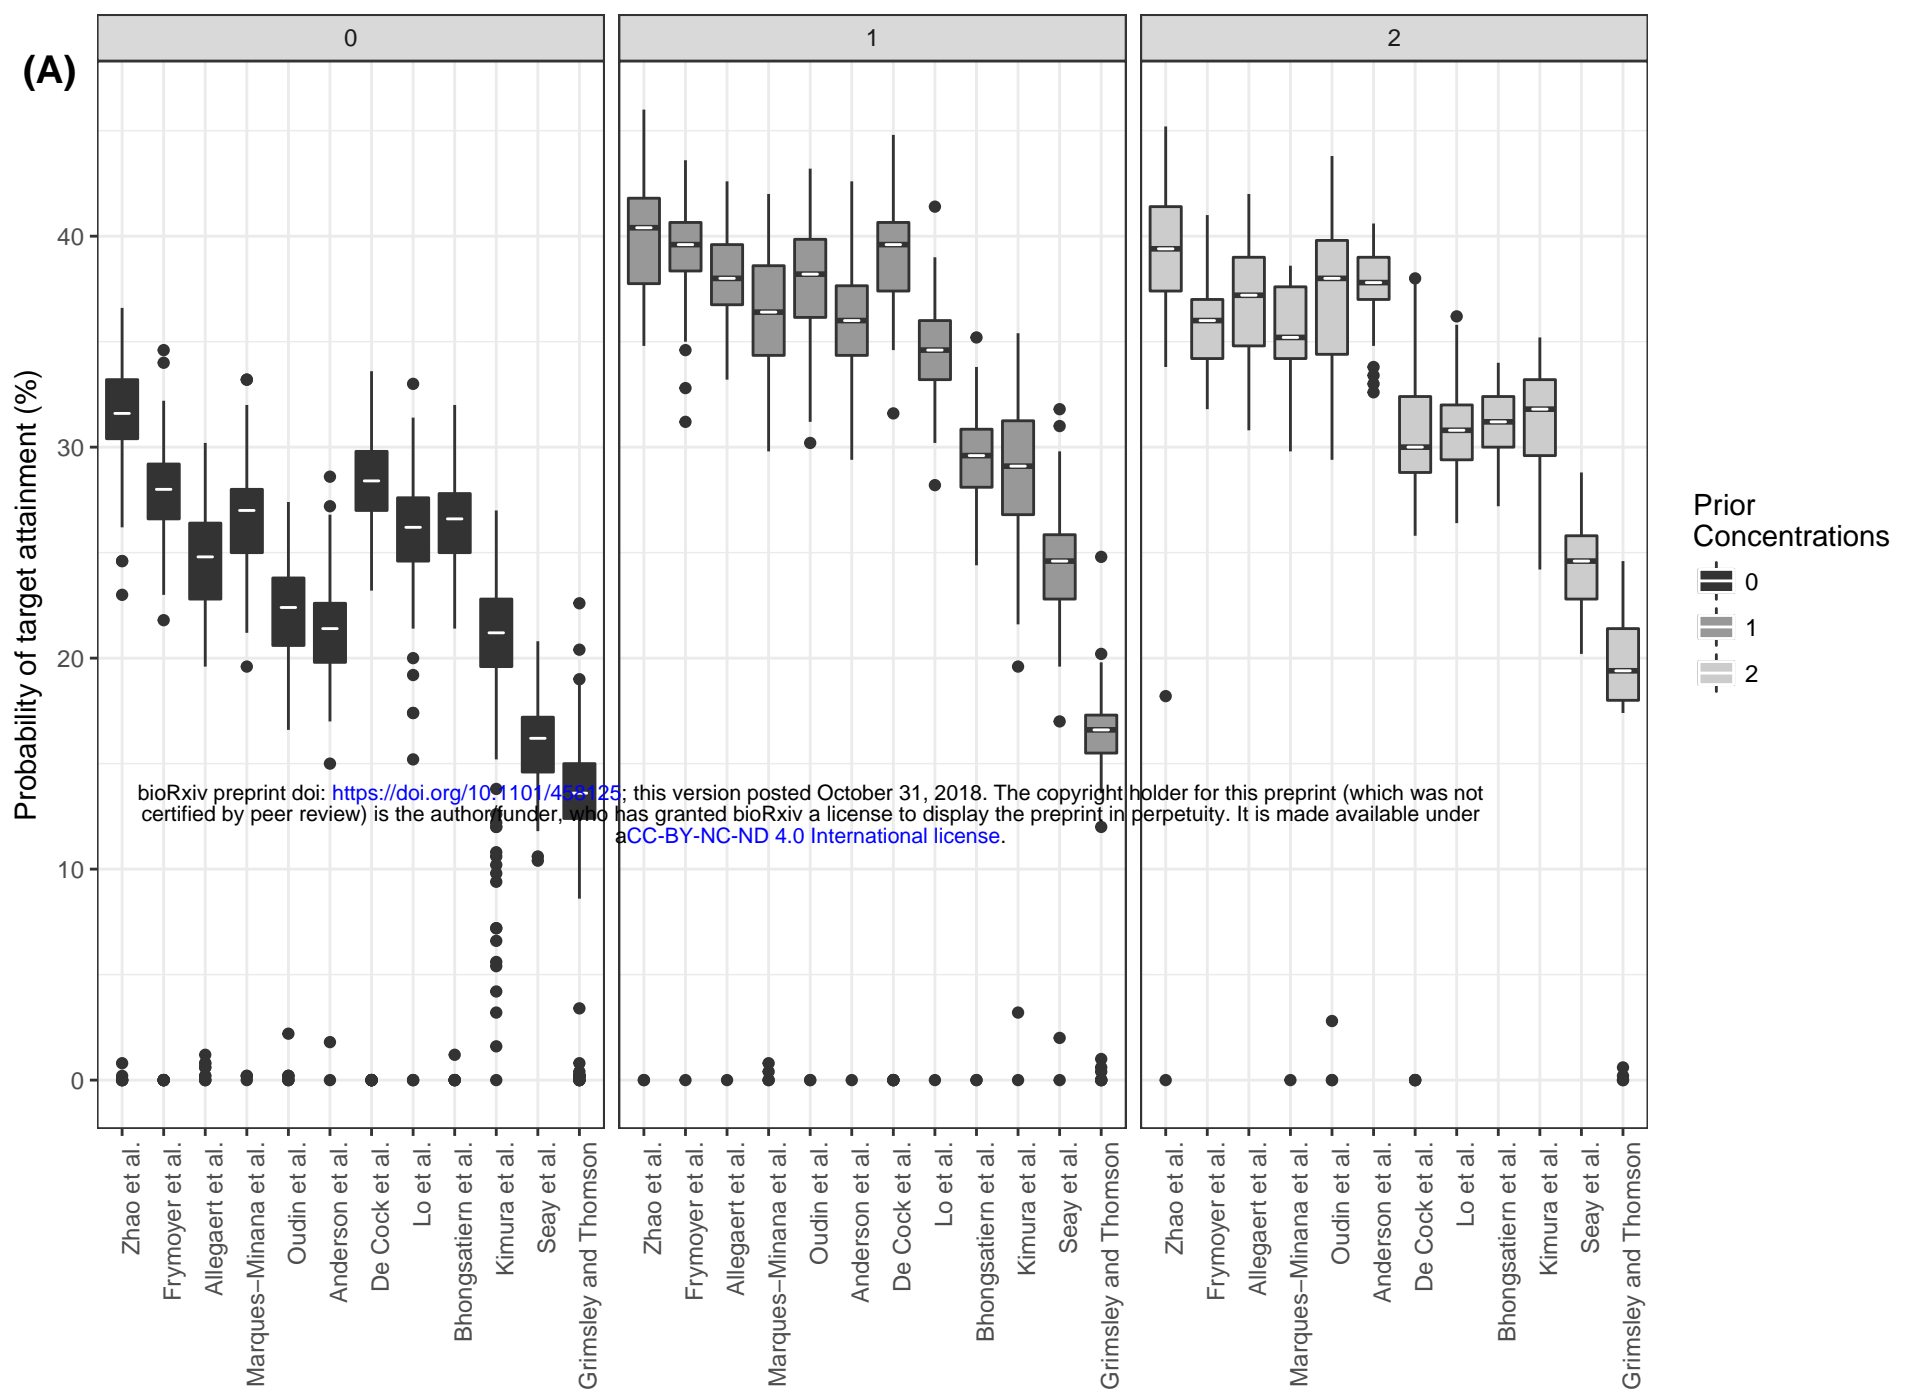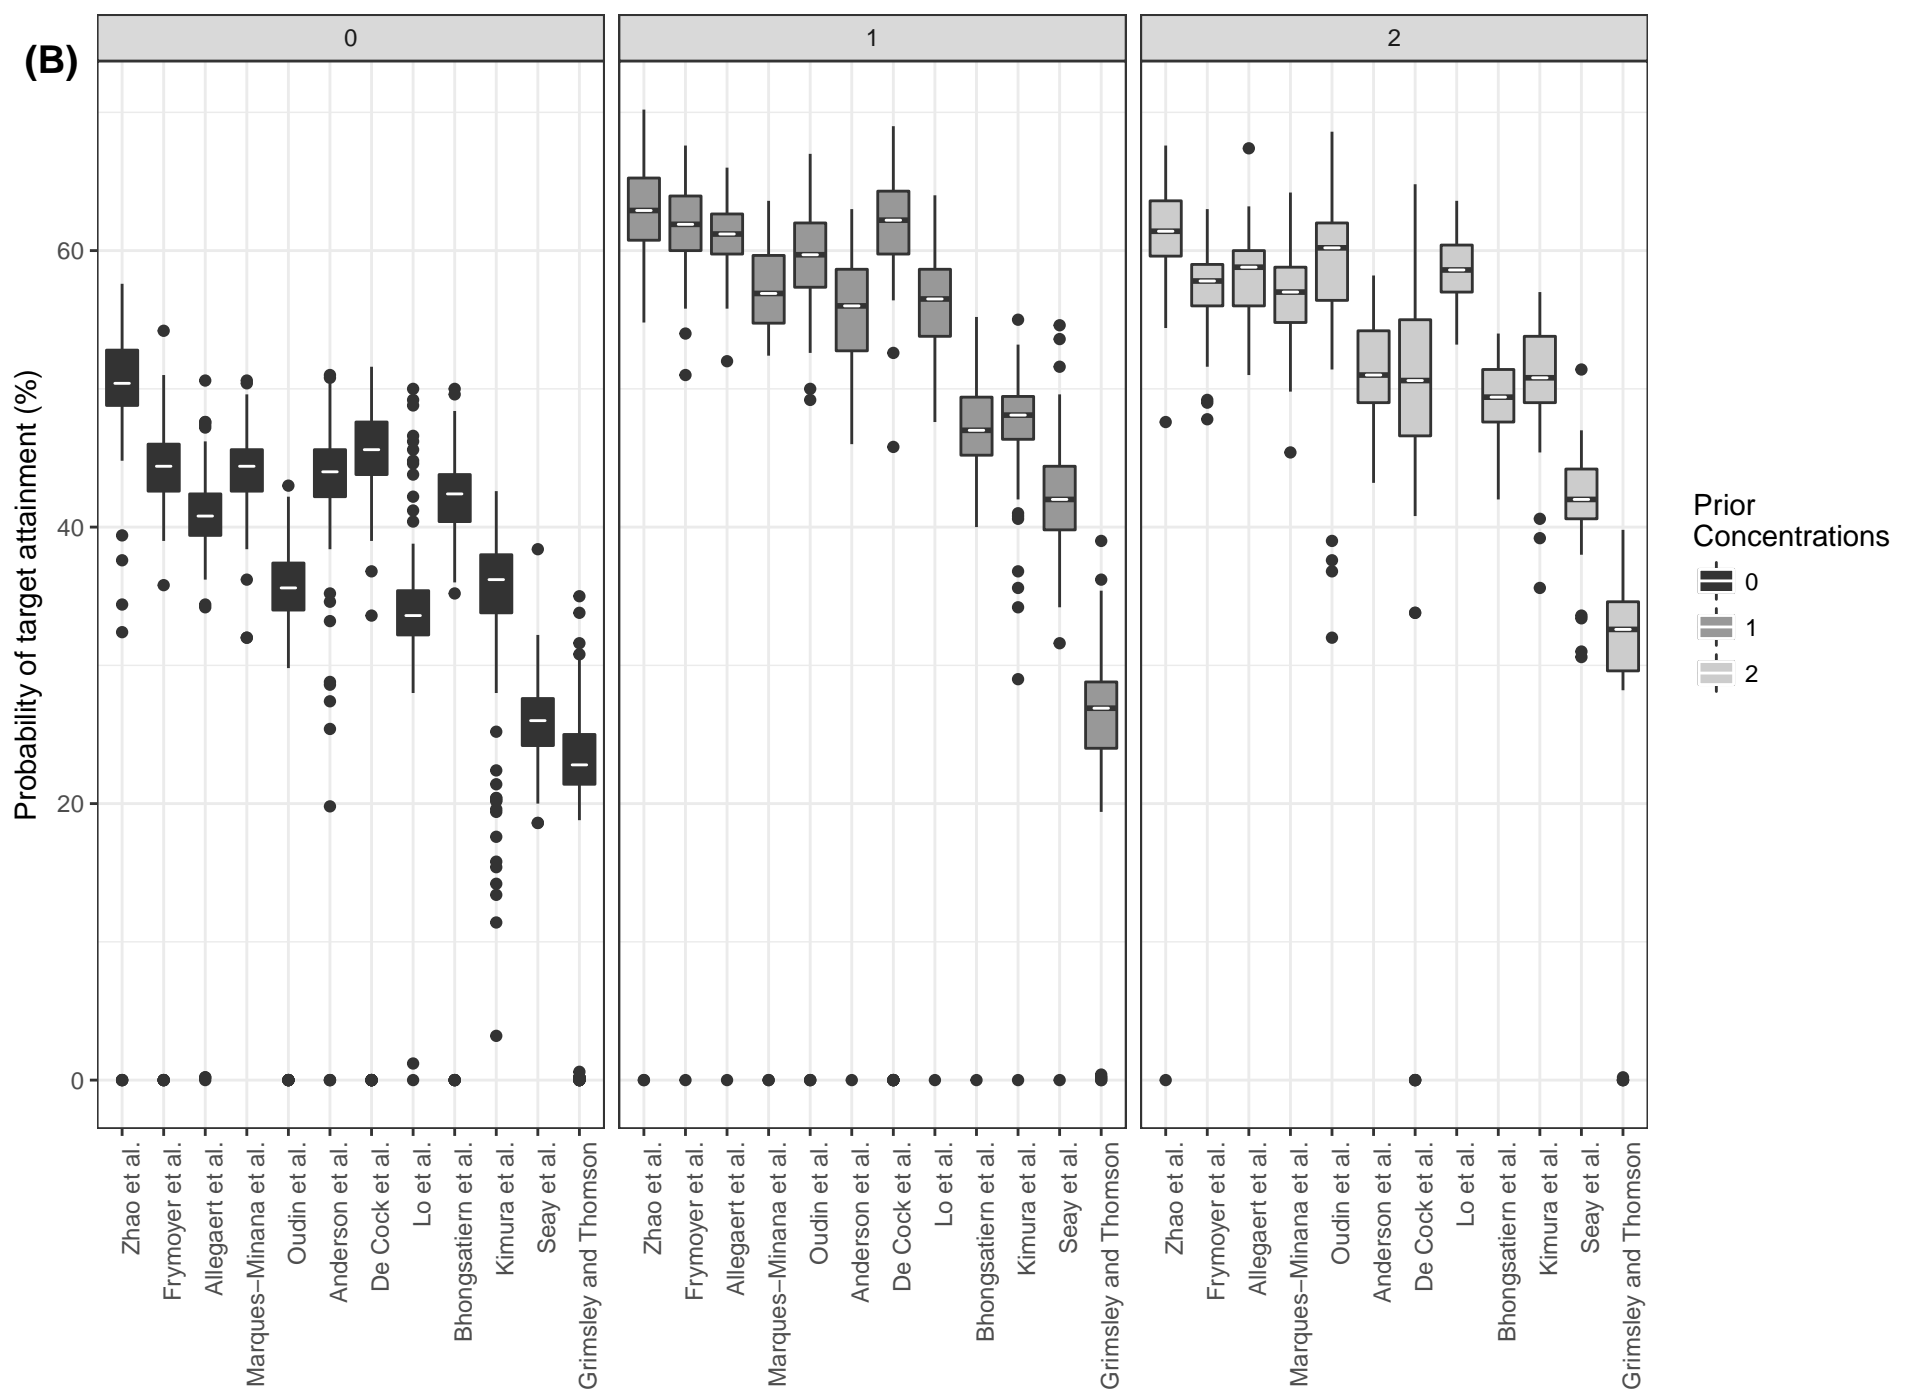

Source: https://www.biorxiv.org/content/biorxiv/early/2018/10/31/458125.full.pdf
